# Supplementary material for: Association of food industry ties with findings of studies examining the effect of dairy food intake on cardiovascular disease and mortality: systematic review and meta-analysis
Source: PubMed Central journal article supplement — BMJ Open. 2020 Dec 4;10(12):e039036. doi: 10.1136/bmjopen-2020-039036 (PMC7722392; doi:10.1136/bmjopen-2020-039036), 2020-12-04
Supplement: bmjopen-2020-039036supp003.pdf [file bmjopen-2020-039036supp003.pdf]

## Supplementary File 3. List of confounders

| Outcome                         | Confounders                                                                                                               | Confounders (all outcomes)                                                  |
|---------------------------------|---------------------------------------------------------------------------------------------------------------------------|-----------------------------------------------------------------------------|
| 1. CVD mortality                | Fibre supplement (p)<br>Red Meat (h)<br>Sodium (Na+) (h)                                                                  | Age<br>Sex<br>BMI                                                           |
| 2. CVD events                   | Fibre supplement (p)<br>Magnesium supplement (p)                                                                          | Smoking<br>Alcohol intake                                                   |
| 3. CHD mortality (incident CVD) | Fibre supplement (p)<br>Trans Fat (h)<br>Polyunsaturated fat (n-6) (p)<br>Sodium (+Na) (h)                                | History of co-morbidities<br>Parenteral/Fhx MI < 60 yrs<br>PA levels<br>SES |
| 4. CHD events (incident CHD)    | Fibre supplement (p)<br>Trans fat (h)<br>Magnesium supplement (p)<br>Polyunsaturated fat (n-6) (p)                        | Total energy intake<br>Fruit & Vegetable intake                             |
| 5. Total MI                     | Aspirin (p)<br>Vitamin E supplement (p)                                                                                   | <i>Specialised Confounders</i><br>Hormone therapy                           |
| 6. Fatal MI                     | Vitamin E supplement (p)                                                                                                  |                                                                             |
| 7. Non-fatal MI                 | Aspirin (p)                                                                                                               |                                                                             |
| 8. Total stroke                 | Potassium supplement (p)<br>Red Meat (h)<br>Sodium (+Na) (h)                                                              |                                                                             |
| 9. Ischemic stroke              | Aspirin (p)<br>Polyunsaturated fat (LC n-3) (p)<br>Red meat (h)                                                           |                                                                             |
| 10. Haemorrhagic stroke         | Aspirin (h)                                                                                                               |                                                                             |
| 11. Systolic BP                 | Magnesium supplement (p)<br>Sodium (-Na) (p)<br>Polyunsaturated fat (supplement) (LC n-3) (p)<br>Potassium supplement (p) |                                                                             |
| 12. Diastolic BP                | Magnesium supplement (p)<br>Sodium (-Na) (p)<br>Polyunsaturated fat (supplement) (LC n-3) (p)<br>Potassium supplement (p) |                                                                             |
| p = protective, h = harmful     |                                                                                                                           |                                                                             |

**a) Not Confounders (inconclusive evidence)**

| Outcome          | Not a confounder (inconclusive)                                                                                                                                  |
|------------------|------------------------------------------------------------------------------------------------------------------------------------------------------------------|
| 1. CVD mortality | Aspirin<br>Dietary Saturated Fat<br>Folate supplement<br>Monounsaturated Fat<br>Multivitamin<br>Polyunsaturated Fat<br>Total Dietary Fat<br>Vitamin E supplement |
| 2. CVD events    | Folate supplement<br>Monounsaturated Fat<br>Multivitamin<br>Polyunsaturated Fat<br>Sodium<br>Total Dietary Fat<br>Vitamin E supplement                           |
| 3. CHD mortality | Dietary Saturated Fat<br>Magnesium supplement                                                                                                                    |
| 4. CHD events    | Dietary Saturated Fat<br>Sodium<br>Red Meat                                                                                                                      |
| 5. Total MI      | Dietary Saturated Fat<br>Folate supplement<br>Magnesium supplement<br>Multivitamin<br>Polyunsaturated Fat<br>Total Dietary Fat                                   |
| 6. Fatal MI      | Folate supplement<br>Multivitamin                                                                                                                                |
| 7. Non-fatal MI  | Dietary Saturated Fat<br>Folate supplement<br>Multivitamin<br>Polyunsaturated Fat<br>Total Dietary Fat<br>Vitamin E supplement                                   |

|                         |                                                                                                                                                                  |
|-------------------------|------------------------------------------------------------------------------------------------------------------------------------------------------------------|
| 8. Total stroke         | Aspirin<br>Dietary Saturated Fat<br>Folate supplement<br>Monounsaturated Fat<br>Multivitamin<br>Polyunsaturated Fat<br>Total Dietary Fat<br>Vitamin E supplement |
| 9. Ischemic stroke      | Dietary Saturated Fat<br>Trans Fat                                                                                                                               |
| 10. Haemorrhagic stroke | Polyunsaturated Fat<br>Red Meat                                                                                                                                  |
| 11. Systolic BP         | Polyunsaturated Fat (dietary)                                                                                                                                    |
| 12. Diastolic BP        | Polyunsaturated Fat (dietary)                                                                                                                                    |
