# Supplementary material for: Association of food industry ties with findings of studies examining the effect of dairy food intake on cardiovascular disease and mortality: systematic review and meta-analysis
Source: HighWire-hosted journal article supplement (doi:10.1136/bmjopen-2020-039036), 2020-12-01
Supplement: bmjopen-2020-039036supp005_data_supplement.pdf [file bmjopen-2020-039036supp005_data_supplement.pdf]

## Supplementary file 5: Characteristics of included studies

| Study ID                           | Study Design | Length of Intervention /Follow up | Number of Participants | Age (mean years) | Exposure (highest tertile/quartile/quintile or 'yes' to dairy foods)                                                                                                                                                                                                          | Comparison (lowest tertile/quartile/quintile or 'no' to dairy foods) | Outcomes Measured (verbatim) | Funding Source            | Disclosed author conflicts of interest |
|------------------------------------|--------------|-----------------------------------|------------------------|------------------|-------------------------------------------------------------------------------------------------------------------------------------------------------------------------------------------------------------------------------------------------------------------------------|----------------------------------------------------------------------|------------------------------|---------------------------|----------------------------------------|
| Aerde, M 2013 <sup>(1)</sup>       | Cohort       | 12.4 years                        | 1,956 men & women      | 61.6 years       | Total Dairy, 271 g/day per SD of the mean intake for Total dairy (all dairy products except butter)                                                                                                                                                                           |                                                                      | Fatal CVD                    | Non-Industry <sup>1</sup> | Yes <sup>a</sup>                       |
| Al-Delaimy, WK 2003 <sup>(2)</sup> | Cohort       | 12 years                          | 39,800 men             | 40-75 years      | Dairy Calcium Q5, 819 mg/day (median) (dairy calcium intake summed the calcium intake from whole milk, skim or low-fat milk, yogurt, ice cream, cottage cheese, and other cheese was summed)                                                                                  | Q1, 106 mg/day                                                       | Fatal Ischemic Heart Disease | Non Industry <sup>2</sup> | No <sup>b</sup>                        |
| Alonso A, 2005 <sup>(3)</sup>      | Cohort       | 27 months                         | 5,880 men & women      | 37 years         | Dairy Q 5, 798.8 g/day (whole-fat milk, partially skim milk, skim milk, condensed milk, whipped cream, yogurt, skim yogurt, milk-shake, cottage cheese or junket, petit Suisse cheese, spreadable cheese wedges, soft unripened cheese, other cheese, custard, and ice cream) | Q 1, 155.6 g/day                                                     | Hypertension                 | Non-industry <sup>3</sup> | No <sup>c</sup>                        |

| Study ID                                  | Study Design | Length of Intervention /Follow up                           | Number of Participants            | Age (mean years)                         | Exposure (highest tertile/quartile/quintile or 'yes' to dairy foods)                                                                                                                                                                                                                                                             | Comparison (lowest tertile/quartile/quintile or 'no' to dairy foods)                                                   | Outcomes Measured (verbatim) | Funding Source            | Disclosed author conflicts of interest |
|-------------------------------------------|--------------|-------------------------------------------------------------|-----------------------------------|------------------------------------------|----------------------------------------------------------------------------------------------------------------------------------------------------------------------------------------------------------------------------------------------------------------------------------------------------------------------------------|------------------------------------------------------------------------------------------------------------------------|------------------------------|---------------------------|----------------------------------------|
| Altorf-van der Kuil, W2012 <sup>(4)</sup> | Cohort       | Mean follow up 7.5 years                                    | 3,588 men & women                 | 44 years                                 | Dairy Protein T3, $\geq 27$ g/day (dairy protein was calculated as protein from milk, yogurt, coffee creamer, curd, pudding, porridge, custard, whipped cream and cheese)                                                                                                                                                        | T1, $\leq 19$ g/day                                                                                                    | Hypertension                 | Industry <sup>4</sup>     | Yes <sup>d</sup>                       |
| Avalos, EE 2013 <sup>(5)</sup>            | Cohort       | Mean follow up 16.2 years                                   | 1,759 men & women                 | 70.6 years men, 70.1 women               | Whole Milk, Non-Fat Milk, Yogurt & Cheese, Sometimes/often (included daily, 4–6 times/week, 1–3 times/week and 1–3 times/months)                                                                                                                                                                                                 | Rarely/never (included never & 1–11 times/year)                                                                        | Incident CHD                 | Non-industry <sup>5</sup> | No <sup>e</sup>                        |
| Bernstein, AM 2012 <sup>(6)</sup>         | 2 Cohorts    | 26 and 22 years of follow-up in women and men, respectively | 127,160 (43 150 men 84 010 women) | Men 40 to 75 years, Woman 30 to 55 years | Whole Fat Q 5, Men 2.55 servings/day, Woman 2.81 servings/day (whole milk, ice cream, hard cheese, full fat cheese, cream, sour cream, cream cheese, butter)<br><br>Low Fat Q5, Men 2.64 servings/day, Women 2.20 servings/day (skim/low-fat milk, 1% and 2% milk, yogurt, cottage and ricotta cheeses, low-fat cheese, sherbet) | Q 1, Men 0.21 servings/day, Woman 0.34 servings/day.<br><br>Low Fat Q1, Men 0.11 servings/day, Women 0.07 servings/day | Total Stroke                 | Non-industry <sup>6</sup> | Yes <sup>f</sup>                       |
| Biong, A 2008 <sup>(7)</sup>              | Case Control |                                                             | 218 men & women                   | 62.4 years                               | Dairy Fat, $> 34.1$ g/day                                                                                                                                                                                                                                                                                                        | $<14.6$ g/day                                                                                                          | First Myocardial Infarction  | Industry <sup>7</sup>     | Yes <sup>g</sup>                       |

| Study ID                        | Study Design | Length of Intervention /Follow up                                      | Number of Participants                                           | Age (mean years)                                                                  | Exposure (highest tertile/quartile/quintile or 'yes' to dairy foods)                                                                                                                                                                                                                                                                                                                    | Comparison (lowest tertile/quartile/quintile or 'no' to dairy foods) | Outcomes Measured (verbatim)     | Funding Source             | Disclosed author conflicts of interest |
|---------------------------------|--------------|------------------------------------------------------------------------|------------------------------------------------------------------|-----------------------------------------------------------------------------------|-----------------------------------------------------------------------------------------------------------------------------------------------------------------------------------------------------------------------------------------------------------------------------------------------------------------------------------------------------------------------------------------|----------------------------------------------------------------------|----------------------------------|----------------------------|----------------------------------------|
| Bonthuis, M 2010 <sup>(8)</sup> | Cohort       | Mean 14.4 years                                                        | 1,529 men & women                                                | 25–78 years                                                                       | Total Dairy T3, 599 g/day (median) ('low-fat dairy products was computed by adding daily servings (in grams) of skim milk, low-fat milk, low-fat yoghurt, cottage or ricotta cheese, whereas the food group 'high-fat/unmodified dairy' included whole milk, cream, ice cream, yoghurt, full-fat cheese and custard. Total dairy intake was the sum of intake of all these dairy foods) | T1, 174 g/day                                                        | Cardiovascular Disease Mortality | Non-Industry <sup>8</sup>  | No <sup>h</sup>                        |
| Buendia, JR 2018 <sup>(9)</sup> | 3 Cohorts    | 30 years of follow-up in NHS, 20 years in NHS II, 24 years in the HPFS | NHS (N=69298), NHS II (N=84368), HPFS (N=30512)                  | Mean baseline ages in the 3 cohorts were 44.6, 35.8, and 50.7 years, respectively | Total Dairy Q4, 3 - <6 servings/day (total dairy intake included: milk (skim, low-fat, whole), ice cream, sherbet/ frozen yogurt, cheese (cottage, ricotta, hard, sliced), and yogurt (all types)                                                                                                                                                                                       | Q1, <0.5 servings/day                                                | High Blood Pressure              | Industry <sup>9</sup>      | No <sup>i</sup>                        |
| Chen, M 2016 <sup>(10)</sup>    | 3 Cohorts    | 24 years in the HPFS, 32 years NHS, 20 years in NHS II                 | 222,234 - 43,652 men HPFS, 87,907 women NHS, 90,675 women NHS II | 40–75 years HPFS, 30–55 years NHS, 25–42 y NHS II                                 | Dairy Fat, Q5                                                                                                                                                                                                                                                                                                                                                                           | Q1                                                                   | CVD                              | Non-Industry <sup>10</sup> | No <sup>j</sup>                        |

| Study ID                          | Study Design | Length of Intervention /Follow up | Number of Participants | Age (mean years)                 | Exposure (highest tertile/quartile/quintile or 'yes' to dairy foods)                                                                                                                                                                                                                                                                                            | Comparison (lowest tertile/quartile/quintile or 'no' to dairy foods) | Outcomes Measured (verbatim)                         | Funding Source             | Disclosed author conflicts of interest |
|-----------------------------------|--------------|-----------------------------------|------------------------|----------------------------------|-----------------------------------------------------------------------------------------------------------------------------------------------------------------------------------------------------------------------------------------------------------------------------------------------------------------------------------------------------------------|----------------------------------------------------------------------|------------------------------------------------------|----------------------------|----------------------------------------|
| Dalmeijer, G 2013 <sup>(11)</sup> | Cohort       | 13 years                          | 33,625 men & women     | 49.0 years                       | Total dairy and its subtypes were evaluated as continuous variables per standard deviation of the mean intake which is 265 g/d for total dairy (total dairy included all dairy food products except for butter and ice cream. Milk and milk products included all kinds of milk, yogurt, coffee creamers, curd, pudding, porridge, custard, and whipping cream) |                                                                      | Incident of Coronary Heart Disease & Incident Stroke | Non-Industry <sup>11</sup> | Yes <sup>k</sup>                       |
| Dauchet, L 2007 <sup>(12)</sup>   | Cohort       | 5.4 years                         | 2,341 men & women      | Men 52.7 years, Women 46.9 years | Dairy Q4, 456 g/day (dairy products including milk, cheese, yogurt, and other dairy products)                                                                                                                                                                                                                                                                   | Q1, 84 g/day                                                         | Systolic & Diastolic Blood Pressure                  | Non-Industry <sup>12</sup> | No <sup>l</sup>                        |

| Study ID                        | Study Design | Length of Intervention /Follow up | Number of Participants | Age (mean years) | Exposure (highest tertile/quartile/quintile or 'yes' to dairy foods)                                                                                                                                                                                                                                                                                | Comparison (lowest tertile/quartile/quintile or 'no' to dairy foods) | Outcomes Measured (verbatim)             | Funding Source             | Disclosed author conflicts of interest |
|---------------------------------|--------------|-----------------------------------|------------------------|------------------|-----------------------------------------------------------------------------------------------------------------------------------------------------------------------------------------------------------------------------------------------------------------------------------------------------------------------------------------------------|----------------------------------------------------------------------|------------------------------------------|----------------------------|----------------------------------------|
| Dehghan, M 2018 <sup>(13)</sup> | Cohort       | 9.1 yrs                           | 136,384 men & women    | 50-1 years       | Dairy Q4, >2 servings/day (median) (dairy comprised milk, yoghurt, various types of cheese, yoghurt drink, and mixed dishes prepared with dairy. Mixed dishes prepared with dairy were disaggregated into their constituents and a proportional weight was assigned to each component. Then each component was included in the related dairy group. | Q1, 0 servings/day                                                   | Cardiovascular Mortality or Major Events | Industry <sup>13</sup>     | No <sup>m</sup>                        |
| Elwood, PC 2004 <sup>(14)</sup> | Cohort       | 20-24 years                       | 2,403 men              | 45-59 years      | Milk Q4, >1 pint per day                                                                                                                                                                                                                                                                                                                            | Q1, None                                                             | Vascular Event                           | Non-Industry <sup>14</sup> | No disclosure                          |

| Study ID                           | Study Design | Length of Intervention /Follow up | Number of Participants | Age (mean years) | Exposure (highest tertile/quartile/quintile or 'yes' to dairy foods)                                                                                                                                                                                                                                                                                                                                                                   | Comparison (lowest tertile/quartile/quintile or 'no' to dairy foods) | Outcomes Measured (verbatim)     | Funding Source             | Disclosed author conflicts of interest |
|------------------------------------|--------------|-----------------------------------|------------------------|------------------|----------------------------------------------------------------------------------------------------------------------------------------------------------------------------------------------------------------------------------------------------------------------------------------------------------------------------------------------------------------------------------------------------------------------------------------|----------------------------------------------------------------------|----------------------------------|----------------------------|----------------------------------------|
| Engberink, MF 2009 <sup>(15)</sup> | Cohort       | 6 years                           | 2,245 men & women      | >55 years        | Dairy Q4, 691 g/day (i.e. 4.5 servings/day) (median intake) (calculated total dairy intake by summing the intake of individual dairy items, except butter and ice cream. The category "milk and milk products" included all kinds of milk, yogurt, coffee creamer, curd, pudding, porridge, custard, and whipped cream. The category "cheese" included all kinds of cheese products, ie, soft cheese, hard cheese, and cheese spreads) | Q1, 164 g/day (i.e. 1 serving/day) (median intake)                   | Hypertension                     | No disclosure              | No <sup>a</sup>                        |
| Farvid, MS 2017 <sup>(16)</sup>    | Cohort       | 8 years                           | 42,403 men & women     | 51.6 years       | Total Dairy Q5, 2.4 servings/day (median) (total dairy product items listed in the food frequency questionnaire included milk, cheese, yogurt, liquid yogurt (doogh), dried yogurt paste (kashk), and cream)                                                                                                                                                                                                                           | Q1, 0.4 servings/day (median)                                        | Cardiovascular Disease Mortality | Non-Industry <sup>15</sup> | No <sup>o</sup>                        |
| Haring, B 2014 <sup>(17)</sup>     | Cohort       | 22 years (median)                 | 12,066 men & women     | 45-64 years      | Dairy Protein Q5, 2.9 servings/day                                                                                                                                                                                                                                                                                                                                                                                                     | Q1, 0.1 median servings/day                                          | Coronary Heart Disease           | Non-Industry <sup>16</sup> | No <sup>p</sup>                        |
| He, K 2003 <sup>(18)</sup>         | Cohort       | 14 years                          | 43,732 men             | 40-75 years      | High Fat Dairy Q5, ≥1/day                                                                                                                                                                                                                                                                                                                                                                                                              | Q1, <1/week                                                          | Ischaemic & Haemorrhagic Stroke  | Non-Industry <sup>17</sup> | No <sup>q</sup>                        |

| Study ID                           | Study Design | Length of Intervention /Follow up | Number of Participants | Age (mean years)               | Exposure (highest tertile/quartile/quintile or 'yes' to dairy foods)                                                                                                                                                                                                                               | Comparison (lowest tertile/quartile/quintile or 'no' to dairy foods) | Outcomes Measured (verbatim)                                            | Funding Source             | Disclosed author conflicts of interest |
|------------------------------------|--------------|-----------------------------------|------------------------|--------------------------------|----------------------------------------------------------------------------------------------------------------------------------------------------------------------------------------------------------------------------------------------------------------------------------------------------|----------------------------------------------------------------------|-------------------------------------------------------------------------|----------------------------|----------------------------------------|
| Heraclides, A 2012 <sup>(19)</sup> | Cohort       | 10 years                          | 1,750 men & women      | Men 43 years, Women 53 years   | Total Dairy T3, 309.0 g/day (median) (full-fat milk; semi-skimmed milk; skimmed milk; milk-containing beverages (full fat, semi-skimmed and skimmed); full-fat cheese; low-fat cheese; full-fat yoghurt; low-fat yoghurt; fruit-flavoured yoghurt (full fat and low fat); and milk-based puddings) | T1, 224.1 g/day                                                      | Incident Hypertension                                                   | Non-Industry <sup>18</sup> | Yes <sup>f</sup>                       |
| Johansson, I 2018 <sup>(20)</sup>  | Cohort       | 8-12 years                        | 27,682 men & women     | 29-65 years                    | Dairy Q 5, 7.1 servings/day (median)                                                                                                                                                                                                                                                               | Q1, 1.6 servings/day (median)                                        | Blood Pressure                                                          | Non-Industry <sup>19</sup> | No <sup>s</sup>                        |
| Johansson, I 2019 <sup>(21)</sup>  | Cohort       | 14.2 years                        | 108,065 men & women    | calculated mean = 52.5 years * | High Fat & Low Fat Non-Fermented Milk & Cheese Q 4, high dose                                                                                                                                                                                                                                      | Q1, low dose                                                         | Myocardial Infarction & Stroke                                          | Non-Industry <sup>20</sup> | No <sup>t</sup>                        |
| Kim, D 2017 <sup>(22)</sup>        | Cohort       | 67.4 months                       | 4,335 men & women      | 40-69 years                    | Total Dairy Q 5, >7 servings/week                                                                                                                                                                                                                                                                  | Q 1, <1 servings/week                                                | Blood Pressure                                                          | Non-Industry <sup>21</sup> | No <sup>a</sup>                        |
| Larsson, S 2009 <sup>(23)</sup>    | Cohort       | 13.6 years                        | 26,556 men             | 50-69 years                    | Dairy Q5, 1295.6 g/day (median) (including low-fat milk, whole milk, sour milk, yogurt, cheese, cream, ice cream, and butter)                                                                                                                                                                      | Q1 286.5 g/day                                                       | Cerebral Infarction, Intracerebral Haemorrhage, Subarachnoid Hemorrhage | Non-Industry <sup>22</sup> | No disclosure                          |

| Study ID                            | Study Design | Length of Intervention /Follow up | Number of Participants | Age (mean years)                             | Exposure (highest tertile/quartile/quintile or 'yes' to dairy foods)                                                                                                                                                                                                                                                                                                   | Comparison (lowest tertile/quartile/quintile or 'no' to dairy foods) | Outcomes Measured (verbatim)                      | Funding Source             | Disclosed author conflicts of interest |
|-------------------------------------|--------------|-----------------------------------|------------------------|----------------------------------------------|------------------------------------------------------------------------------------------------------------------------------------------------------------------------------------------------------------------------------------------------------------------------------------------------------------------------------------------------------------------------|----------------------------------------------------------------------|---------------------------------------------------|----------------------------|----------------------------------------|
| Larsson, SC 2012 <sup>(24)</sup>    | Cohort       | 10.2 years                        | 74,961 men & women     | 45-83 years                                  | Dairy Q5, 9.3 servings/day (median) (dairy foods included low-fat milk (0.5% fat), medium-fat milk (1.5% fat), full-fat milk (3% fat), milk in pancakes, low-fat sour milk/yogurt (0.5% fat), full-fat sour milk/yogurt (3% fat), cottage cheese (4% fat), low-fat cheese (10%-17% fat), full-fat cheese (approximately 28% fat), ice cream, cream, and creme fraiche) | Q1, 2.3 servings/day                                                 | Total Stroke                                      | Non-Industry <sup>23</sup> | No <sup>v</sup>                        |
| Li, K 2012 <sup>(25)</sup>          | Cohort       | 11 years                          | 23,980 men & women     | 35-64 years                                  | Dairy Calcium Q4, 780 mg/day                                                                                                                                                                                                                                                                                                                                           | Q1, 188 mg/day                                                       | CVD Mortality                                     | Non-Industry <sup>24</sup> | No <sup>w</sup>                        |
| Lin, PH 2013 <sup>(26)</sup>        | Cohort       | 12 years                          | 2,061 men & women      | 45.8 years (no information for stroke group) | Dairy T3, (dairy milk of any kind, cheese, yogurt).                                                                                                                                                                                                                                                                                                                    | T1                                                                   | Total Stroke                                      | Non-Industry <sup>25</sup> | No <sup>x</sup>                        |
| Lockheart, MSK 2007 <sup>(27)</sup> | Case Control |                                   | 211 men & women        | 62.5 years cases and 62.2 years controls     | Low Fat Dairy T3, 618 g/day (Low-fat milk, skimmed milk, light sour cream)                                                                                                                                                                                                                                                                                             | T 1, 48 g/day                                                        | First Myocardial Infarction                       | Industry <sup>26</sup>     | No disclosure                          |
| Louie, JCY 2013 <sup>(28)</sup>     | Cohort       | 15 years                          | 2,625 men & women      | 49-97 years                                  | Total Dairy T3, 2.9 servings/day (median) (included all dairy foods)                                                                                                                                                                                                                                                                                                   | T1, 0.6 servings/day                                                 | Total CVD                                         | Industry <sup>27</sup>     | No disclosure                          |
| Mazidi, M, 2018 <sup>(29)</sup>     | Cohort       | 76.4 months                       | 24,474 men & women     | 47.6 years                                   | Total Dairy Q4, 3.08 cup equivalent servings/day (total dairy, milk, cheese, and yogurt)                                                                                                                                                                                                                                                                               | Q1, 0.25 cup equivalent servings/day                                 | CHD Mortality & Cerebrovascular Disease mortality | Non-Industry <sup>28</sup> | No <sup>y</sup>                        |

| Study ID                             | Study Design | Length of Intervention /Follow up | Number of Participants | Age (mean years) | Exposure (highest tertile/quartile/quintile or 'yes' to dairy foods)                                                                                                                                                                                                                                                                                                                                                         | Comparison (lowest tertile/quartile/quintile or 'no' to dairy foods) | Outcomes Measured (verbatim)  | Funding Source             | Disclosed author conflicts of interest |
|--------------------------------------|--------------|-----------------------------------|------------------------|------------------|------------------------------------------------------------------------------------------------------------------------------------------------------------------------------------------------------------------------------------------------------------------------------------------------------------------------------------------------------------------------------------------------------------------------------|----------------------------------------------------------------------|-------------------------------|----------------------------|----------------------------------------|
| Ness, AR 2001 <sup>(30)</sup>        | Cohort       | 25 years                          | 5,765 men              | 35-64 years      | Milk T3, > 1 pint (= 0.568 liters)                                                                                                                                                                                                                                                                                                                                                                                           | T1, None                                                             | Cardiovascular Disease Deaths | Non-Industry <sup>29</sup> | No <sup>z</sup>                        |
| Nettleton, J 2008 <sup>(31)</sup>    | Cohort       | 13.3 years                        | 14,153 men & women     | 45 to 64 years   | High Fat Dairy, per 1 daily serving difference in food group intake                                                                                                                                                                                                                                                                                                                                                          |                                                                      | Incident Heart Failure        | Non Industry <sup>30</sup> | No <sup>aa</sup>                       |
| Panagiotakos, D 2009 <sup>(32)</sup> | Cohort       | 5 years                           | 3,042 men & women      | 18-89 years      | Low Fat Dairy, 1-unit increase in components' scores (0%, 2% or total fat), like cheese, yogurt, milk)                                                                                                                                                                                                                                                                                                                       |                                                                      | CVD Events                    | Non-Industry <sup>31</sup> | No disclosure                          |
| Patterson, E 2013 <sup>(33)</sup>    | Cohort       | 11.6 years                        | 33,636 women           | 48-83 years      | Total Dairy, Q5 8.4 servings/day (median) (total dairy intake was the sum of milk [full-fat ( $\geq 3.0\%$ fat), semi-skimmed ( $\leq 1.5\%$ fat), skimmed (0.5% fat), and pancakes], cultured milk/yogurt [full-fat ( $\geq 3.0\%$ fat) and low-fat ( $\leq 1.5\%$ fat)], cheese [full-fat ( $> 17\%$ fat), low-fat ( $\leq 17\%$ fat), and cottage cheese/ quark], cream and creme fariche (full fat and low fat) intakes) | Q1, 2.2 servings/day                                                 | Myocardial Infarction         | Non Industry <sup>32</sup> | No <sup>bb</sup>                       |
| Praagman, J 2015 (a) <sup>(34)</sup> | Cohort       | 13.3 years (median)               | 4,235 men & women      | 66.9 years       | Total Dairy, T3 >400g/day (total dairy included milk, buttermilk, yogurt, coffee creamer, curd, pudding, porridge, custard, whipped cream, ice cream, and cheese, but not butter)                                                                                                                                                                                                                                            | Total Dairy, T 1 <200 g/day                                          | Fatal Stroke & Fatal CHD      | Industry <sup>33</sup>     | Yes <sup>cc</sup>                      |

| Study ID                                | Study Design | Length of Intervention /Follow up | Number of Participants | Age (mean years)              | Exposure (highest tertile/quartile/quintile or 'yes' to dairy foods)                                                                                                                                                                                                                                                                                      | Comparison (lowest tertile/quartile/quintile or 'no' to dairy foods) | Outcomes Measured (verbatim)        | Funding Source             | Disclosed author conflicts of interest |
|-----------------------------------------|--------------|-----------------------------------|------------------------|-------------------------------|-----------------------------------------------------------------------------------------------------------------------------------------------------------------------------------------------------------------------------------------------------------------------------------------------------------------------------------------------------------|----------------------------------------------------------------------|-------------------------------------|----------------------------|----------------------------------------|
| Praagman, J 2015 (b) <sup>(35)</sup>    | Cohort       | 15 years                          | 34,409 men & women     | Men 51 years & women 43 years | Total Yogurt & Cheese Q4, (fermented dairy foods)                                                                                                                                                                                                                                                                                                         | Q1                                                                   | CVD Mortality                       | Non-Industry <sup>34</sup> | Yes <sup>dd</sup>                      |
| Sauvaget, C 2003 <sup>(36)</sup>        | Cohort       | 16 years                          | 37,130 men & women     | 56 years                      | Dairy Q4, Almost Daily (dairy products (butter and cheese, excluding margarine))                                                                                                                                                                                                                                                                          | Q1, Never                                                            | Total Stroke                        | Non-Industry <sup>35</sup> | No disclosure                          |
| Snijder, MB 2008 <sup>(37)</sup>        | Cohort       | 6.4 years                         | 1,124 men & women      | 50–75 years                   | Dairy Q4, 5.75-17.24 servings/day (range) (total dairy consumption was categorized as low-fat dairy ( $\leq 2\%$ fat) or high-fat dairy ( $> 2\%$ fat). The variable dairy desserts included yoghurt, curds, and custard. The variable milk included low-fat, skim, and, whole milk. The variable yoghurt included all low-fat, skim, and whole yoghurts) | Q1 0-2.97 servings/day (range)                                       | Systolic & Diastolic Blood Pressure | Industry <sup>36</sup>     | Yes <sup>ee</sup>                      |
| Soedamah-Muthu, SS 2013 <sup>(38)</sup> | Cohort       | 10.8 years                        | 4,255 men & women      | 56 years                      | Dairy, T3 575 g/day (median) (all dairy products, except butter and ice cream)                                                                                                                                                                                                                                                                            | T1, 246 g/day (median)                                               | Fatal & Non-Fatal CHD               | Non-Industry <sup>37</sup> | Yes <sup>ff</sup>                      |
| Steffen, LM 2005 <sup>(39)</sup>        | Cohort       | 15 years                          | 4,304 men & women      | 18-30 years                   | Dairy Foods Q5, $> 3.4$ times/day (dairy foods, including milk, cheese, yogurt, and dairy desserts)                                                                                                                                                                                                                                                       | Q1, $< 1.1$ times/day                                                | Blood Pressure                      | Non-Industry <sup>38</sup> | No <sup>gg</sup>                       |

| Study ID                         | Study Design | Length of Intervention /Follow up | Number of Participants | Age (mean years)               | Exposure (highest tertile/quartile/quintile or 'yes' to dairy foods)                                                                                                                                                                                                                                   | Comparison (lowest tertile/quartile/quintile or 'no' to dairy foods) | Outcomes Measured (verbatim) | Funding Source             | Disclosed author conflicts of interest |
|----------------------------------|--------------|-----------------------------------|------------------------|--------------------------------|--------------------------------------------------------------------------------------------------------------------------------------------------------------------------------------------------------------------------------------------------------------------------------------------------------|----------------------------------------------------------------------|------------------------------|----------------------------|----------------------------------------|
| Tavani, A 2002 <sup>(40)</sup>   | Case Control |                                   | 985 men & women        | 61 years (median)              | Total milk >7 cups/week, Yogurt >= 7 portions/week, Cheese >=350g/week                                                                                                                                                                                                                                 | Total milk 0 cups/week, Yogurt 0 portions/week, Cheese <200g/week    | Acute Myocardial Infarction  | Non-Industry <sup>39</sup> | No <sup>hh</sup>                       |
| Um, C 2017 <sup>(41)</sup>       | Cohort       | 5.7 years of follow-up            | 21,427 men & women     | calculated mean = 64.8 years** | Total Dairy Q5, 17.8 servings/day (dairy products (milk, cream, fermented dairy products, ice cream, butter, cheeses))                                                                                                                                                                                 | Q1, 0.9 servings/day                                                 | CVD Mortality                | Non-Industry <sup>40</sup> | No <sup>ii</sup>                       |
| Umesawa, M, 2008 <sup>(42)</sup> | Cohort       | 12.9-year follow-up               | 41,526 men & women     | 40-59 years                    | Dairy Calcium, Q5, 116 mg/day (median) (to calculate dairy calcium intake, we specified 2 kinds of dairy products, ie, cheese and dairy products except cheese, for the baseline questionnaire, and 4 kinds, ie, whole milk, low fat milk, cheese, and yogurt, for the 5-year follow-up questionnaire) | Q1, 0 mg/day                                                         | Total Stroke & CHD           | Non-Industry <sup>41</sup> | No <sup>jj</sup>                       |

| Study ID                     | Study Design | Length of Intervention /Follow up | Number of Participants | Age (mean years) | Exposure (highest tertile/quartile/quintile or 'yes' to dairy foods)                                                                                                                                                                                                                                                                         | Comparison (lowest tertile/quartile/quintile or 'no' to dairy foods) | Outcomes Measured (verbatim) | Funding Source             | Disclosed author conflicts of interest |
|------------------------------|--------------|-----------------------------------|------------------------|------------------|----------------------------------------------------------------------------------------------------------------------------------------------------------------------------------------------------------------------------------------------------------------------------------------------------------------------------------------------|----------------------------------------------------------------------|------------------------------|----------------------------|----------------------------------------|
| Wang, L 2008 <sup>(43)</sup> | Cohort       | 10 years                          | 28,886 women           | 53.8 years       | Total Dairy Q5, 3.69 servings/day (median) (total dairy product intake was calculated by summing the intake of individual dairy items: low-fat dairy items include skim or low-fat milk, sherbet, yogurt, and cottage/ricotta cheese, high-fat dairy items include whole milk, cream, sour cream, ice cream, cream cheese, and other cheese) | Q1, 0.56 servings/day (median)                                       | Hypertension                 | Non-Industry <sup>42</sup> | No <sup>kk</sup>                       |

\* We calculated the mean age score of participants by summing Non-cases, T2D, MI and stroke cases at baseline and dividing them by 4

\*\*We calculated the mean age score of participants by summing all quintiles 1, 3, & 5 (they were the only ones available) at baseline and dividing them by 5

### Description of Funding Source (Verbatim)

1. The Hoorn Study has been made possible by the Vrije Universiteit Amsterdam and the VU University Medical Center, and by grants from the Dutch Diabetes Research Foundation, the Dutch Organization for Scientific Research, the Netherlands Heart Foundation, and the Health Research and Development Council of the Netherlands.
2. Supported by research grants HL24074, HL34594, DK36798, and CA87969 from the National Institutes of Health.
3. Supported by the Spanish Ministry of Health (grants PI040233 and G03-140), the Navarra Regional Government (PI41-2005), and the University of Navarra (línea especial Nutricio LE-97).AA was supported partially by a Fulbright fellowship and an MMA Foundation grant.
4. The Doetinchem Cohort Study was financially supported by the Ministry of Health, Welfare and Sport of the Netherlands and the National Institute for Public Health and the Environment. For the present analysis, Wageningen University was supported by the Top Institute Food and Nutrition, which is a public/private partnership that generates vision on scientific breakthroughs in food and nutrition, resulting in the development of innovative products and technologies. Partners are major Dutch Food companies and research organisations.
5. The study was supported by grants AG007181 and AG028507 from the National Institutes of Health/National Institute on Aging, and by grant DK31801 from the National Institute of Diabetes and Digestive and Kidney Diseases.
6. This study was supported by grant P01CA087969 from the National Institutes of Health, Department of Health and Human Services. A.M.B. was supported through the Harvard Human Nutrition Program.
7. The study was supported financially by the Research Council of Norway, Throne Holst's Foundation for Nutrition Research, The Norwegian Association of Margarine Producers, DeNoFa Fabrikker A/S and Tine BA. Tine BA is a dairy company.
8. This study was supported by the National Health and Medical Research Council of Australia.
9. Funding sources: The Nurses' Health Study and Health Professionals Follow-up Study cohorts are supported by grants UM1 CA186107, UM1 CA176726, and UM1 CA167552 from the National Institutes of Health. The current analyses were supported by small grants from the National Dairy Council, the General Mills Bell Institute for Health and Nutrition, and the Boston Nutrition and Obesity Research Center.
10. Supported by the NIH (grants R01 HL034594, UM1 CA176726, UM1 CA186107, R01 HL35464, R01 HL088521, R01 CA67262, HL60712, and UM1 CA167552).
11. This research was supported by a personal Dr. Dekker postdoctoral grant (2008T062) from The Netherlands Heart Foundation (JWJ Beulens).
12. The SU.VI.MAX study is supported by the Direction Générale de la Santé, the Ministère de la Santé, and the Institut Virtuel de Recherche en Santé Publique (groupe cohorte) INSERM.
13. The PURE Study is an investigator-initiated study that is funded by the Population Health Research Institute, the Canadian Institutes of Health Research (CIHR), Heart and Stroke Foundation of Ontario, support from CIHR's Strategy for Patient Oriented Research (SPOR) through the Ontario SPOR Support Unit, as well as the Ontario Ministry of Health and Long-Term Care and through unrestricted grants from several pharmaceutical companies, with major contributions from AstraZeneca (Canada), Sanofi-Aventis (France and Canada), Boehringer Ingelheim (Germany and Canada), Servier, and GlaxoSmithKline, and additional contributions from Novartis and King Pharma and from various

national or local organisations in participating countries. These include Brazil: Unilever Health Institute, Brazil; South Africa: The SA Sugar Association (SASA).

14. The Medical Research Council, the University of Wales College of Medicine and Bristol University, Food Standards Agency.
15. This work was supported by Tehran University of Medical Sciences (grant 82-603); Cancer Research UK (grant C20/A5860); the Intramural Research Program of the National Cancer Institute, US National Institutes of Health (grant Z01 CP000185-03); and various collaborative research agreements with the International Agency for Research on Cancer. M.F. was supported by a Takemi Fellowship from the Japan Pharmaceutical Manufacturers Association.
16. The Atherosclerosis Risk in Communities Study is carried out as a collaborative study supported by National Heart, Lung, and Blood Institute contracts (HHSN268201100005C, HHSN268201100006C, HHSN268201100007C, HHSN268201100008C, HHSN268201100009C, HHSN268201100010C, HHSN268201100011C, and HHSN268201100012C).
17. This work was supported by the research grant HL35464 and CA55075 from the National Institutes of Health.
18. The study was funded by the Medical Research Council, and some aspects of the analysis were funded by The European Commission, Quality of Life and Management of Living Resources Programme, contract number QLGI-CT-2000-01643.
19. The present study was supported by the Swedish Research Council for Health, Working Life and Welfare (FORTE).
20. This research was funded by The Swedish Research Council for Health, Working Life and Welfare (FORTE), grant number 2016-00960. The Northern Sweden Diet Database has been supported by the Swedish Research Council for Health, Working Life and Welfare (FORTES) and The Swedish Research Council.
21. This research was supported by the Basic Science Research Program of the National Research Foundation of Korea (NRF), funded by the Ministry of Education, Science, and Technology (NRF2016R1D1A1B03931307).
22. The Alpha-Tocopherol, Beta-Carotene Cancer Prevention Study was supported by Public Health Service contracts N01-CN-45165, N01-RC-45035 and N01-RC-37004 from the US National Cancer Institute, National Institutes of Health, Department of Health and Human Services, Bethesda, Md. Dr. Larsson's research at the National Public Health Institute in Helsinki, Finland, was supported by a grant from the Swedish Council for Working Life and Social Research.
23. This study was supported by a research grant from the Swedish Council for Working Life and Social Research (FAS), the Swedish Research Council, and by a Research Fellow grant from Karolinska Institutet (to Dr Larsson).
24. This work was supported by supported by the Deutsche Krebshilfe (grant-No70-488-Ha I) and the Graduiertenkolleg 793: Epidemiology of communicable and chronic non-communicable disease and their inter-relationships.
25. Data collection was supported by the Department of Health in Taiwan.
26. The present study was supported by NIH NRSA T32HL007779, CVD Epidemiology and Prevention, American Heart Association – Greater Midwest Affiliate, Throne Holst's Foundation for Nutrition Research, The Norwegian Association of Margarine Producers, DeNoFa Fabriker A/S and Tine Norwegian Dairies.
27. This study was funded by Dairy Australia.

28. This manuscript was written independently; no company or institution supported it financially.
29. Funding: this study was provided with funding by a grant from the NHS Management Executive Cardiovascular Disease and Stroke Research and Development Initiative.
30. This research was supported by the National Institutes of Health grant HL73366, training grant T32 HL07779, and contracts N01-HC-55015, N01-HC-55016, N01-HC-55018, N01-HC-55019, N01-HC-55020, N01-HC-55021, and N01-HC-55022 from the National Heart, Lung, and Blood Institute.
31. The ATTICA study was supported by research grants from the Hellenic Cardiological Society (HCS2002).
32. Supported by research grants from the Swedish Council for Working Life and Social Research and from the Swedish Research Council/Infrastructure Medicine.
33. This study was supported by an unrestricted grant from the Dutch Dairy Organization (NZO) for epidemiological analyses on dairy intake and cardiovascular diseases.
34. The present study was supported by a personal Dr Dekker postdoctoral grant (2008T062) from the Netherlands Heart Foundation (J. W. J. B.).
35. This publication is based on research performed at the Radiation Effects Research Foundation (RERF), Hiroshima and Nagasaki, Japan. RERF is a private nonprofit foundation funded equally by the Japanese Ministry of Health, Labor and Welfare and the US Department of Energy through the National Academy of Sciences.
36. This particular study has been supported by a grant from the Dutch Dairy Association (NZO).
37. The Whitehall II study was supported by grants from the Medical Research Council (G0902037), the British Heart Foundation (RG/07/008/23674), the Stroke Association, the National Heart Lung and Blood Institute (5RO1 HL036310), the National Institute on Aging (5RO1AG13196) and the Agency for Health Care Policy Research (5RO1AG034454).
38. The CARDIA Study is supported by National Heart, Lung, and Blood Institute contracts N01-HC-48047, N01-HC-48048, N01-HC-48049, N01-HC-48050, and N01-HC-95095.
39. Funding: partly supported by the Italian Ministry of Health (Programmi Speciali).
40. The REGARDS research project is supported by a cooperative agreement U01 NS041588 from the National Institute of Neurological Disorders and Stroke, National Institutes of Health, Department of Health and Human Service. Additional support provided by the Franklin Foundation.
41. This study was supported by grants-in-aid for cancer research and by the Third Term Comprehensive Ten-Year Strategy for Cancer Control from the Ministry of Health, Labor and Welfare of Japan.
42. This work was supported by research grants CA-047988 and HL-080467 from the National Institutes of Health, Bethesda, Md.

### **Description of Author Disclosure Statement (Verbatim)**

- a) Sabita S. Soedamah-Muthu and Johanna M. Geleijnse obtained an unrestricted grant from the Dutch Dairy Association (NZO) to carry out meta-analyses on the association between dairy products and CVD.
- b) None of the authors had any conflict of interest from a financial, personal, or professional aspect in relation to the findings of this study.
- c) None of the authors had any conflicts of interest.
- d) Altorf-van der Kuil W, Engberink MF, Geleijnse JM - Top Institute Food and Nutrition, PO Box 557, 6700 AN, Wageningen, The Netherlands.
- e) The authors have no conflicts of interest.
- f) D.M. received research grants for studying the effects of diet on cardiometabolic diseases from the National Institutes of Health; the Searle Scholar Award from the Searle Funds at The Chicago Community Trust; the Genes and Environment Initiative at the Harvard School of Public Health; and the Gates Foundation/World Health Organization Global Burden of Diseases, Injuries, and Risk Factors Study; and from GlaxoSmithKline, Sigma Tau, Pronova, and the National Institutes of Health for an investigator-initiated, not-for-profit clinical trial of fish oil and postsurgical complications. He also received ad hoc travel reimbursement and/or honoraria for research presentations from the Chicago Council, International Life Sciences Institute, Aramark, Unilever, SPRIM, Nutrition Impact, Norwegian Seafood Export Council, United Nations Food and Agricultural Organization, World Health Organization, US Food and Drug Administration, and several universities. He received ad hoc consulting fees from Foodminds and royalties from UpToDate for an online chapter on fish oil.
- g) A. S. Biong is employed as a Ph.D. student in a research project funded jointly by TINE BA, a Norwegian dairy company, and the Norwegian Research Council.
- h) The authors declare no conflict of interest.
- i) There are no conflicts of interest.
- j) None of the authors reported a conflict of interest related to the study.
- k) SS-Mand MG obtained an unrestricted grant from the Dutch Dairy Association (NZO) to carry out meta-analyses on the association between dairy products and cardiovascular diseases.
- l) None of the authors had any personal or financial conflicts of interest.
- m) We declare no competing interests.
- n) There were no conflicts of interest.
- o) Conflict of interest: none declared
- p) The authors have declared that no competing interests exist.
- q) Competing interests: None declared.
- r) SSM, JMG and AH and were supported by an unrestricted grant from the Dutch dairy industry (NZO).
- s) The authors declare that they have no competing interests.
- t) The authors declare no conflict of interest
- u) The authors have no conflicts of interest to declare.

- v) Disclosures: None.
- w) Competing interests None.
- x) AUTHOR DISCLOSURES None.
- y) All authors have nothing to declare in relation to the subject of this paper.
- z) Conflicts of interest: none.
- aa) The authors have no conflicts of interest to report.
- bb) Author disclosures: E. Patterson, S. C. Larsson, A. Wolk, and A. A kesson, no conflicts of interest.
- cc) J.M.G and S.S.S.M received an unrestricted grant from the Dutch Dairy Organization (NZO) for epidemiological analyses on dairy intake and cardiovascular diseases.
- dd) S. S. S. M. received an unrestricted research grant from the Global Dairy Platform, Dairy Research Institute and Dairy Australia for a meta-analysis project on the effect of cheese on lipids.
- ee) Gerrit J. Hiddink - Dutch Dairy Association (NZO), Zoetermeer, The Netherlands.
- ff) S. S. S.-M., L. V. and J. M. G. obtained an unrestricted grant from the Dutch Dairy Association (NZO) to carry out meta-analyses on the association between dairy products.
- gg) None of the authors had any conflicts of interest.
- hh) Conflicts of interest: none.
- ii) Conflict of Interests: None.
- jj) Disclosures: None.
- kk) Disclosures: None.

## References

1. Aerde M, Soedamah-Muthu S, Geleijnse J, et al. Dairy intake in relation to cardiovascular disease mortality and all-cause mortality: the Hoorn Study. *European Journal of Nutrition*. 2013;52(2):609-16 8p.
2. Al-Delaimy WK, Rimm E, Willett WC, et al. A prospective study of calcium intake from diet and supplements and risk of ischemic heart disease among men. *American Journal of Clinical Nutrition*. 2003;77(4):814-8 5p.
3. Alonso A, Beunza JJ, Delgado-Rodriguez M, et al. Low-fat dairy consumption and reduced risk of hypertension: the Seguimiento Universidad de Navarra (SUN) cohort. *American Journal of Clinical Nutrition*. 2005;82(5):972-9.
4. Altorf-van der Kuil W, Engberink MF, Geleijnse JM, et al. Sources of dietary protein and risk of hypertension in a general Dutch population. *British Journal of Nutrition*. 2012;108(10):1897-903 7p.
5. Avalos EE, Barrett-Connor E, Kritz-Silverstein D, et al. Is dairy product consumption associated with the incidence of CHD? Public health nutrition. 2013;16(11):2055-63.
6. Bernstein AM, Pan A, Rexrode KM, et al. Dietary protein sources and the risk of stroke in men and women. *Stroke*. 2012;43(3):637-44.
7. Biong AS, Rebnoord HM, Fimreite RL, et al. Intake of dairy fat and dairy products, and risk of myocardial infarction: A case-control study. *International Journal of Food Sciences and Nutrition*. 2008;59(2):155-65.
8. Bonthuis M, Hughes MCB, Ibiebele TI, et al. Dairy consumption and patterns of mortality of Australian adults. *European journal of clinical nutrition*. 2010;64(6):569-77.
9. Buendia JR, Yanping L, Hu FB, et al. Long-term yogurt consumption and risk of incident hypertension in adults. *Journal of Hypertension*. 2018;36(8):1671-9.
10. Chen M, Li Y, Sun Q, et al. Dairy fat and risk of cardiovascular disease in 3 cohorts of US adults. *American Journal of Clinical Nutrition*. 2016;104(5):1209-17.
11. Dalmeijer GW, Struijk EA, van der Schouw YT, et al. Dairy intake and coronary heart disease or stroke—A population-based cohort study. *International Journal of Cardiology*. 2013;167(3):925-9.
12. Dauchet L, Kesse-Guyot E, Czernichow S, et al. Dietary patterns and blood pressure change over 5-y follow-up in the SU.VI.MAX cohort. *The American journal of clinical nutrition*. 2007;85(6):1650-6.
13. Dehghan M, Mente A, Rangarajan S, et al. Association of dairy intake with cardiovascular disease and mortality in 21 countries from five continents (PURE): a prospective cohort study. *Lancet*. 2018;392 North American Edition(10161):2288-97.
14. Elwood PC, Pickering JE, Fehily AM, et al. Milk drinking, ischaemic heart disease and ischaemic stroke I. Evidence from the Caerphilly cohort. *European Journal of Clinical Nutrition*. 2004;58(5):711-7.
15. Engberink MF, Hendriksen MA, Schouten EG, et al. Inverse association between dairy intake and hypertension: the Rotterdam Study. *The American journal of clinical nutrition*. 2009;89(6):1877-83.
16. Farvid MS, Malekshah AF, Pourshams A, et al. Dairy Food Intake and All-Cause, Cardiovascular Disease, and Cancer Mortality. *American Journal of Epidemiology*. 2017;185(8):697-711.

17. Haring B, Gronroos N, Nettleton JA, et al. Dietary Protein Intake and Coronary Heart Disease in a Large Community Based Cohort: Results from the Atherosclerosis Risk in Communities (ARIC) Study. *PloS one*. 2014;9(10):e109552.
18. He K, Merchant A, Rimm EB, Rosner BA, et al. Dietary fat intake and risk of stroke in male US healthcare professionals: 14 year prospective cohort study. *BMJ*. 2003;327(7418):777-82.
19. Heraclides A, Mishra GD, Hardy RJ, et al. Dairy intake, blood pressure and incident hypertension in a general British population: the 1946 birth cohort. *European journal of nutrition*. 2012;51(5):583-91.
20. Johansson I, Nilsson LM, Esberg A, et al. Dairy intake revisited - associations between dairy intake and lifestyle related cardio-metabolic risk factors in a high milk consuming population. *Nutrition Journal*. 2018;17(1):N.PAG-N.PAG.
21. Johansson I, Esberg A, Nilsson LM, et al. Dairy Product Intake and Cardiometabolic Diseases in Northern Sweden: A 33-Year Prospective Cohort Study. *Nutrients*. 2019;11(2):284.
22. Kim D, Kim J. Dairy consumption is associated with a lower incidence of the metabolic syndrome in middle-aged and older Korean adults: the Korean Genome and Epidemiology Study (KoGES). *British Journal of Nutrition*. 2017;117(1):148-60.
23. Larsson SC, Männistö S, Virtanen MJ, et al. Dairy foods and risk of stroke. *Epidemiology (Cambridge, Mass)* [Internet]. 2009; 20(3):[355-60 pp.]. Available from: <http://onlinelibrary.wiley.com/doi/10.1111/j.1469-7610.2009.02070.x>
24. Larsson SC, Virtamo J, Wolk A. Dairy consumption and risk of stroke in Swedish women and men. *Stroke*. 2012;43(7):1775-80.
25. Li K, Kaaks R, Linseisen J, et al. Associations of dietary calcium intake and calcium supplementation with myocardial infarction and stroke risk and overall cardiovascular mortality in the Heidelberg cohort of the European Prospective Investigation into Cancer and Nutrition study (EPIC-Heidelberg). *Heart*. 2012;98(12):920-5.
26. Lin PH, Yeh WT, Svetkey LP, et al. Dietary intakes consistent with the DASH dietary pattern reduce blood pressure increase with age and risk for stroke in a Chinese population. *Asia Pacific journal of clinical nutrition*. 2013;22(3):482-91.
27. Lockheart MSK, Steffen LM, Rebnord HM, et al. Dietary patterns, food groups and myocardial infarction: a case-control study. *British Journal of Nutrition*. 2007;98(2):380-7.
28. Louie JCY, Flood VM, Burlutsky G, et al. Dairy consumption and the risk of 15-year cardiovascular disease mortality in a cohort of older Australians. *Nutrients*. 2013;5(2):441-54.
29. Mazidi M, Mikhailidis DP, Sattar N, et al. Consumption of dairy product and its association with total and cause specific mortality - A population-based cohort study and meta-analysis. *Clin Nutr*. 2018.
30. Ness AR, Smith GD, Hart C. Milk, coronary heart disease and mortality. *Journal of Epidemiology & Community Health*. 2001;55(6):379-82.
31. Nettleton JA, Steffen LM, et al. Incident heart failure is associated with lower whole-grain intake and greater high-fat dairy and egg intake in the Atherosclerosis Risk in Communities (ARIC) study. *Journal of the American Dietetic Association*. 2008;108(11):1881-7.
32. Panagiotakos D, Pitsavos C, Chrysohou C, et al. Dietary patterns and 5-year incidence of cardiovascular disease: A multivariate analysis of the ATTICA study. *Nutrition, Metabolism and Cardiovascular Diseases*. 2009;19(4):253-63.
33. Patterson E, Larsson SC, Wolk A, et al. Association between dairy food consumption and risk of myocardial infarction in women differs by type of dairy food. *The Journal of nutrition*. 2013;143(1):74-9.

34. Praagman J, Franco OH, Ikram MA, et al. Dairy products and the risk of stroke and coronary heart disease: the Rotterdam Study. *European journal of nutrition*. 2015;54(6):981-90.
35. Praagman J, Dalmeijer GW, van der Schouw YT, et al. The relationship between fermented food intake and mortality risk in the European Prospective Investigation into Cancer and Nutrition-Netherlands cohort. *British Journal of Nutrition*. 2015;113(3):498-506.
36. Sauvaget C, Nagano J, Allen N, et al. Intake of animal products and stroke mortality in the Hiroshima/Nagasaki Life Span Study. *International journal of epidemiology*. 2003;32(4):536-43.
37. Snijder MB, van Dam RM, Stehouwer CD, et al. A prospective study of dairy consumption in relation to changes in metabolic risk factors: the Hoorn Study. *Obesity (Silver Spring, Md)*. 2008;16(3):706-9.
38. Soedamah-Muthu SS, Masset G, Verberne L, Geleijnse JM, et al. Consumption of dairy products and associations with incident diabetes, CHD and mortality in the Whitehall II study. *The British journal of nutrition*. 2013;109(4):718-26.
39. Steffen LM, Kroenke CH, Yu X, et al. Associations of plant food, dairy product, and meat intakes with 15-y incidence of elevated blood pressure in young black and white adults: the Coronary Artery Risk Development in Young Adults (CARDIA) Study. *American Journal of Clinical Nutrition*. 2005;82(6):1169-77; quiz 363-4.
40. Tavani A, Gallus S, Negri E, et al. Milk, dairy products, and coronary heart disease. *Journal of Epidemiology & Community Health*. 2002;56(6):471-2.
41. Um CY, Judd SE, Flanders WD, et al. Associations of Calcium and Dairy Products with All-Cause and Cause-Specific Mortality in the REasons for Geographic and Racial Differences in Stroke (REGARDS) Prospective Cohort Study. *Nutrition & Cancer*. 2017;69(8):1185-95.
42. Umesawa M, Iso H, Ishihara J, et al. Dietary calcium intake and risks of stroke, its subtypes, and coronary heart disease in Japanese: the JPHC Study Cohort I. *Stroke*. 2008;39(9):2449-56.
43. Wang L, Manson JE, Buring JE, et al. Dietary intake of dairy products, calcium, and vitamin D and the risk of hypertension in middle-aged and older women. *Hypertension*. 2008;51(4):1073-9.
