# Supplementary material for: Association of food industry ties with findings of studies examining the effect of dairy food intake on cardiovascular disease and mortality: systematic review and meta-analysis
Source: PubMed Central journal article supplement — BMJ Open. 2020 Dec 4;10(12):e039036. doi: 10.1136/bmjopen-2020-039036 (PMC7722392; doi:10.1136/bmjopen-2020-039036), 2020-12-04
Supplement: bmjopen-2020-039036supp006.pdf [file bmjopen-2020-039036supp006.pdf]

## Supplementary File 6. Risk of bias in included studies

Funding Source, n (%<sup>a</sup>)

|                                |                                                                   |                 | Sponsorship          |                          | COI          |                | Industry Ties              |                                       |
|--------------------------------|-------------------------------------------------------------------|-----------------|----------------------|--------------------------|--------------|----------------|----------------------------|---------------------------------------|
| Characteristic                 | Category                                                          | Total<br>N = 43 | Industr<br>y<br>N= 8 | Non-<br>Industry<br>N=35 | COI<br>N =10 | No COI<br>N=33 | Industry<br>/COI<br>N = 14 | Non-<br>Industry/<br>No COI<br>N = 29 |
| <b>Risk of Bias Assessment</b> |                                                                   |                 |                      |                          |              |                |                            |                                       |
|                                | Serious/Critical Bias due to confounding                          | 43 (100)        | 8 (100)              | 35 (100)                 | 10 (100)     | 33 (100)       | 14 (100)                   | 29 (100)                              |
|                                | Serious/Critical Bias in selection of participants into the study | 6 (14)          | 1 (13)               | 5 (14)                   | 1 (10)       | 5 (15)         | 2 (14)                     | 4 (14)                                |
|                                | Serious/Critical Bias in classification of exposures              | 16 (37)         | 3 (38)               | 13 (37)                  | 2 (20)       | 14 (42)        | 3 (21)                     | 13 (44)                               |
|                                | Serious/Critical Bias due to deviations from exposures            | 21 (49)         | 3 (38)               | 18 (51)                  | 6 (60)       | 15 (45)        | 7 (50)                     | 14 (48)                               |
|                                | Serious/Critical Bias due to missing data                         | 10 (23)         | 2 (25)               | 8 (23)                   | 3 (30)       | 7 (21)         | 3 (21)                     | 7 (24)                                |

|  |                                                        |          |         |          |          |          |          |          |
|--|--------------------------------------------------------|----------|---------|----------|----------|----------|----------|----------|
|  | Serious/Critical Bias in measurement of outcomes       | 6 (14)   | 2 (25)  | 4 (11)   | 1 (10)   | 5 (15)   | 2 (14)   | 4 (14)   |
|  | Serious/Critical Bias in selection of reported results | 4 (9)    | 1 (13)  | 3 (9)    | 2 (20)   | 2 (6)    | 2 (14)   | 2 (7)    |
|  | Serious/Critical overall risk of bias                  | 43 (100) | 8 (100) | 35 (100) | 10 (100) | 33 (100) | 14 (100) | 29 (100) |

<sup>a</sup> Percentages may not add to 100 due to rounding
