# Supplementary material for: Association of food industry ties with findings of studies examining the effect of dairy food intake on cardiovascular disease and mortality: systematic review and meta-analysis
Source: PubMed Central journal article supplement — BMJ Open. 2020 Dec 4;10(12):e039036. doi: 10.1136/bmjopen-2020-039036 (PMC7722392; doi:10.1136/bmjopen-2020-039036), 2020-12-04
Supplement: bmjopen-2020-039036supp007.pdf [file bmjopen-2020-039036supp007.pdf]

Supplementary File 7: Favorable Outcomes by Industry Ties v No Industry Ties, Industry Sponsorship v No Industry Sponsorship and Conflicts of Interest v No Conflicts of Interest

| Industry Ties: Industry Sponsorship and/or Author Conflicts of Interest |                |                                        |                                  |                                      | No Industry Ties: No Industry Sponsorship and No Author Conflicts of Interest |                |                                        |                                  |                                      |
|-------------------------------------------------------------------------|----------------|----------------------------------------|----------------------------------|--------------------------------------|-------------------------------------------------------------------------------|----------------|----------------------------------------|----------------------------------|--------------------------------------|
| Study ID                                                                | Funding Source | Disclosed author conflicts of interest | Results Favourable/ Unfavourable | Conclusions Favourable/ Unfavourable | Study ID                                                                      | Funding Source | Disclosed author conflicts of interest | Results Favourable/ Unfavourable | Conclusions Favourable/ Unfavourable |
| Aerde, M 2013                                                           | Non-Industry   | Yes                                    | U                                | U                                    | Al-Delaimy, WK 2003                                                           | Non-Industry   | No                                     | U                                | U                                    |
| Altorf-van der Kuil, W2012                                              | Industry       | Yes                                    | U                                | U                                    | Alonso A, 2005                                                                | Non-industry   | No                                     | U                                | U                                    |
| Bernstein, AM 2012                                                      | Non-industry   | Yes                                    | U                                | U                                    | Avalos, EE 2013                                                               | Non-industry   | No                                     | U                                | U                                    |
| Biong, A 2008                                                           | Industry       | Yes                                    | U                                | F                                    | Bonthuis, M 2010                                                              | Non-Industry   | No                                     | U                                | U                                    |
| Buendia, JR 2018                                                        | Industry       | No                                     | F                                | F                                    | Chen, M 2016                                                                  | Non-Industry   | No                                     | U                                | F                                    |
| Dalmeijer, G 2013                                                       | Non-Industry   | Yes                                    | U                                | F                                    | Dauchet, L 2007                                                               | Non-Industry   | No                                     | U                                | U                                    |
| Dehghan, M 2018                                                         | Industry       | No                                     | U                                | F                                    | Elwood, PC 2004                                                               | Non-Industry   | No disclosure                          | U                                | U                                    |
| Heraclides, A 2012                                                      | Non-Industry   | Yes                                    | U                                | U                                    | Engberink, MF 2009                                                            | No disclosure  | No                                     | U                                | F                                    |
| Lockheart, MSK 2007                                                     | Industry       | No disclosure                          | U                                | U                                    | Farvid, MS 2017                                                               | Non-Industry   | No                                     | F                                | F                                    |
| Louie, JCY 2013                                                         | Industry       | No disclosure                          | U                                | U                                    | Haring, B 2014                                                                | Non-Industry   | No                                     | U                                | U                                    |
| Praagman, J 2015                                                        | Industry       | Yes                                    | U                                | U                                    | He, K 2003                                                                    | Non-Industry   | No                                     | U                                | U                                    |

| Industry Ties: Industry Sponsorship and/or Author Conflicts of Interest |                |                                        |                                  |                                      | No Industry Ties: No Industry Sponsorship and No Author Conflicts of Interest |                |                                        |                                  |                                      |
|-------------------------------------------------------------------------|----------------|----------------------------------------|----------------------------------|--------------------------------------|-------------------------------------------------------------------------------|----------------|----------------------------------------|----------------------------------|--------------------------------------|
| Study ID                                                                | Funding Source | Disclosed author conflicts of interest | Results Favourable/ Unfavourable | Conclusions Favourable/ Unfavourable | Study ID                                                                      | Funding Source | Disclosed author conflicts of interest | Results Favourable/ Unfavourable | Conclusions Favourable/ Unfavourable |
| Praagman J, 2015                                                        | Non-Industry   | Yes                                    | U                                | U                                    | Johansson, I 2018                                                             | Non-Industry   | No                                     | U                                | U                                    |
| Snijder, MB 2008                                                        | Industry       | Yes                                    | U                                | U                                    | Johansson, I 2019                                                             | Non-Industry   | No                                     | U                                | U                                    |
| Soedamah-Muthu, SS 2013                                                 | Non-Industry   | Yes                                    | U                                | U                                    | Kim, D 2017                                                                   | Non-Industry   | No                                     | F                                | F                                    |
|                                                                         |                |                                        |                                  |                                      | Larsson,S 2009                                                                | Non-Industry   | No disclosure                          | U                                | U                                    |
|                                                                         |                |                                        |                                  |                                      | Larsson, SC 2012                                                              | Non-Industry   | No                                     | U                                | U                                    |
|                                                                         |                |                                        |                                  |                                      | Li, K 2012                                                                    | Non-Industry   | No                                     | U                                | U                                    |
|                                                                         |                |                                        |                                  |                                      | Lin, PH 2013                                                                  | Non-Industry   | No                                     | U                                | U                                    |
|                                                                         |                |                                        |                                  |                                      | Mazidi, M, 2018                                                               | Non-Industry   | No                                     | F                                | F                                    |
|                                                                         |                |                                        |                                  |                                      | Ness, AR 2001                                                                 | Non-Industry   | No                                     | U                                | U                                    |
|                                                                         |                |                                        |                                  |                                      | Nettleton, J 2008                                                             | Non-Industry   | No                                     | U                                | U                                    |
|                                                                         |                |                                        |                                  |                                      | Panagiotakos, D 2009                                                          | Non-Industry   | No disclosure                          | U                                | U                                    |
|                                                                         |                |                                        |                                  |                                      | Patterson, E 2013                                                             | Non-Industry   | No                                     | F                                | F                                    |
|                                                                         |                |                                        |                                  |                                      | Sauvaguet, C 2003                                                             | Non-Industry   | No disclosure                          | F                                | F                                    |
|                                                                         |                |                                        |                                  |                                      | Steffen, LM 2005                                                              | Non-Industry   | No                                     | U                                | U                                    |

| Industry Ties: Industry Sponsorship and/or Author Conflicts of Interest |                |                                        |                                  |                                      | No Industry Ties: No Industry Sponsorship and No Author Conflicts of Interest |                |                                        |                                  |                                      |
|-------------------------------------------------------------------------|----------------|----------------------------------------|----------------------------------|--------------------------------------|-------------------------------------------------------------------------------|----------------|----------------------------------------|----------------------------------|--------------------------------------|
| Study ID                                                                | Funding Source | Disclosed author conflicts of interest | Results Favourable/ Unfavourable | Conclusions Favourable/ Unfavourable | Study ID                                                                      | Funding Source | Disclosed author conflicts of interest | Results Favourable/ Unfavourable | Conclusions Favourable/ Unfavourable |
|                                                                         |                |                                        |                                  |                                      | Tavani, A 2002                                                                | Non-Industry   | No                                     | <b>F</b>                         | <b>F</b>                             |
|                                                                         |                |                                        |                                  |                                      | Um, C 2017                                                                    | Non-Industry   | No                                     | <b>U</b>                         | <b>F</b>                             |
|                                                                         |                |                                        |                                  |                                      | Umesawa, M, 2008                                                              | Non-Industry   | No                                     | <b>F</b>                         | <b>F</b>                             |
|                                                                         |                |                                        |                                  |                                      | Wang,L 2008                                                                   | Non-Industry   | No                                     | <b>F</b>                         | <b>F</b>                             |

**Favourable results - Statistical significance: Industry ties vs no industry ties; industry sponsorship vs no sponsorship; COI v no COI**

#### Industry Ties

|              | Industry/COI | Non-Industry/No COI |
|--------------|--------------|---------------------|
| Favourable   | 1            | 8                   |
| Unfavourable | 13           | 21                  |

RR= 0.26 (95% CI 0.04, 1.87)

#### Industry Sponsorship

|              | Industry | Non-Industry |
|--------------|----------|--------------|
| Favourable   | 1        | 8            |
| Unfavourable | 7        | 27           |

RR = 0.55 (95% CI 0.08, 3.77)

Conflicts of Interest

|              |     |        |
|--------------|-----|--------|
|              | COI | No/COI |
| Favourable   | 0   | 9      |
| Unfavourable | 10  | 24     |

RR= 0.16 (95% CI 0.01, 2.57)

Favourable conclusions: Industry ties vs no industry ties; industry sponsorship vs no sponsorship; COI v no COI

Industry Ties

|              |              |                     |
|--------------|--------------|---------------------|
|              | Industry/COI | Non-Industry/NO COI |
| Favourable   | 4            | 11                  |
| Unfavourable | 10           | 18                  |

RR = 0.75 (95% CI 0.29, 1.95)

Industry Sponsorship

|              |          |              |
|--------------|----------|--------------|
|              | Industry | Non-Industry |
| Favourable   | 3        | 12           |
| Unfavourable | 5        | 23           |

RR= 1.09 (95% CI 0.40, 2.99)

### Conflicts of Interest

|              | COI | No COI |
|--------------|-----|--------|
| Favourable   | 2   | 13     |
| Unfavourable | 8   | 20     |

RR =0.51 (95% 0.14, 1.88)

**Concordance between study results and conclusions: Industry ties vs no industry ties; industry sponsorship vs no sponsorship; COI v no COI**

### Industry Ties

|         | Industry/COI | Non-Industry/NO COI |
|---------|--------------|---------------------|
| Discord | 3            | 3                   |
| Concord | 11           | 26                  |

RR = 2.07 (95% CI 0.48, 8.99)

### Industry Sponsorship

|         | Industry | Non-Industry |
|---------|----------|--------------|
| Discord | 2        | 4            |
| Concord | 6        | 31           |

RR = 2.19 (95% CI 0.48, 9.94)

Conflicts of Interest

|              |     |        |
|--------------|-----|--------|
|              | COI | No/COI |
| Favourable   | 2   | 4      |
| Unfavourable | 8   | 29     |

RR = 1.65 (95% CI 0.35, 7.72)
