# Supplementary material for: Association of food industry ties with findings of studies examining the effect of dairy food intake on cardiovascular disease and mortality: systematic review and meta-analysis
Source: HighWire-hosted journal article supplement (doi:10.1136/bmjopen-2020-039036), 2020-12-01

## Supplementary File 8. Results for each of the meta-analyses conducted

## Effect Size, Cardiovascular Disease: Industry ties v no industry ties, Risk Ratio

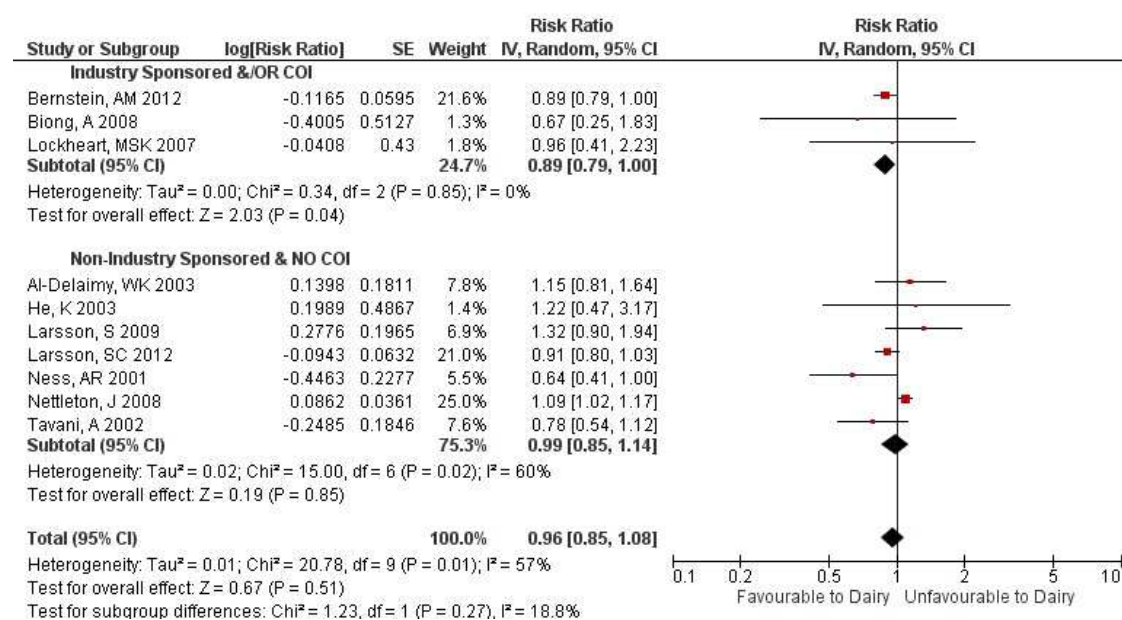

## Effect Size, Cardiovascular Disease: Industry ties v no industry ties, Hazard Ratio

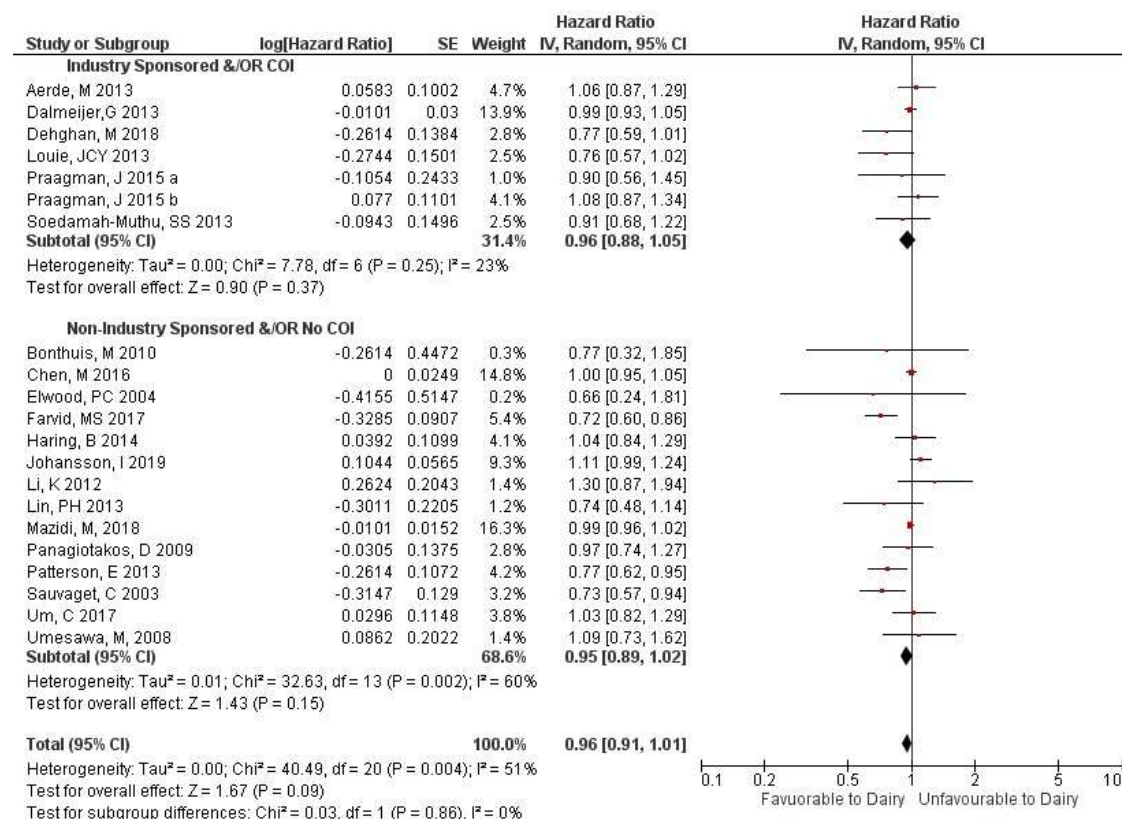

## Effect Size, Cardiovascular Disease: Industry sponsorship vs no industry sponsorship, Risk Ratio

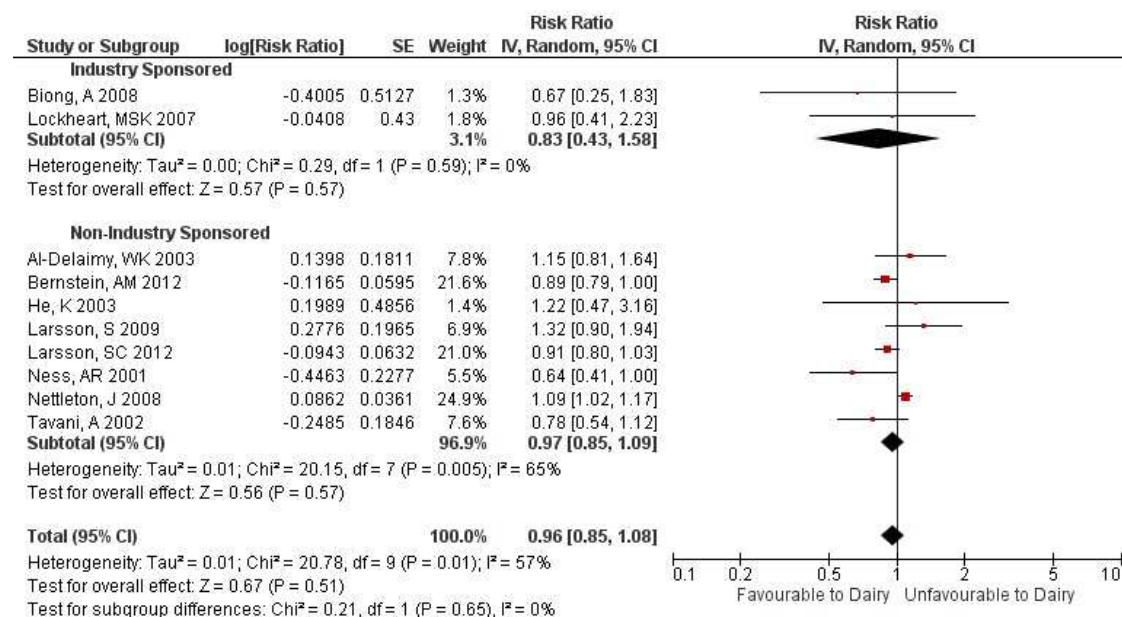

## Effect Size, Cardiovascular Disease: COI vs No COI, Risk Ratio

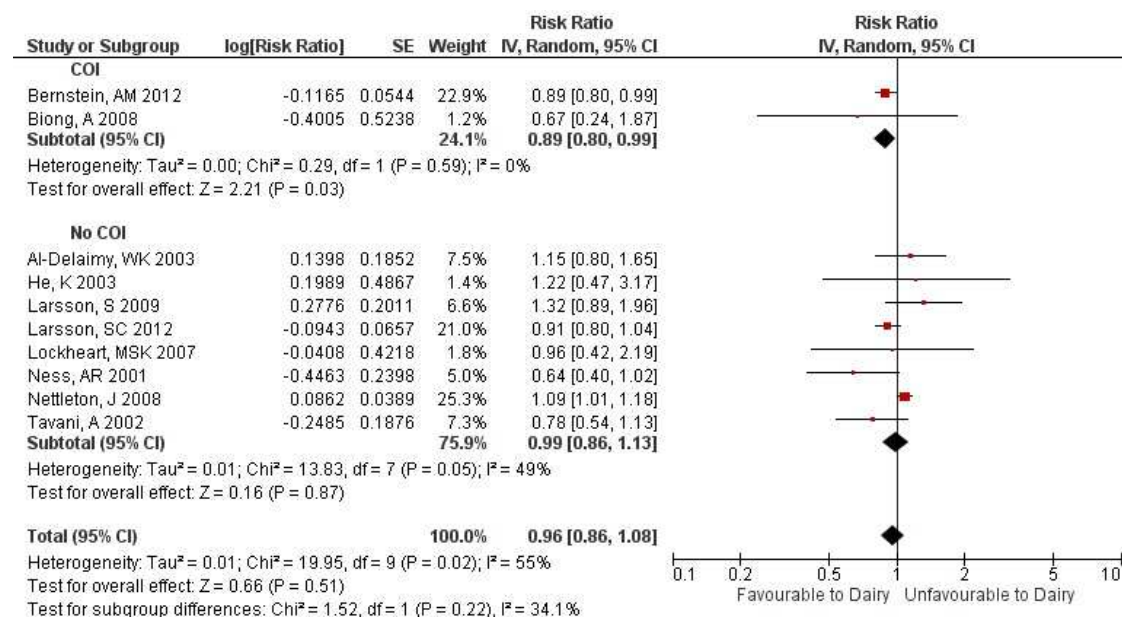

## Effect Size, Cardiovascular Disease: COI vs no COI, Hazard Ratio

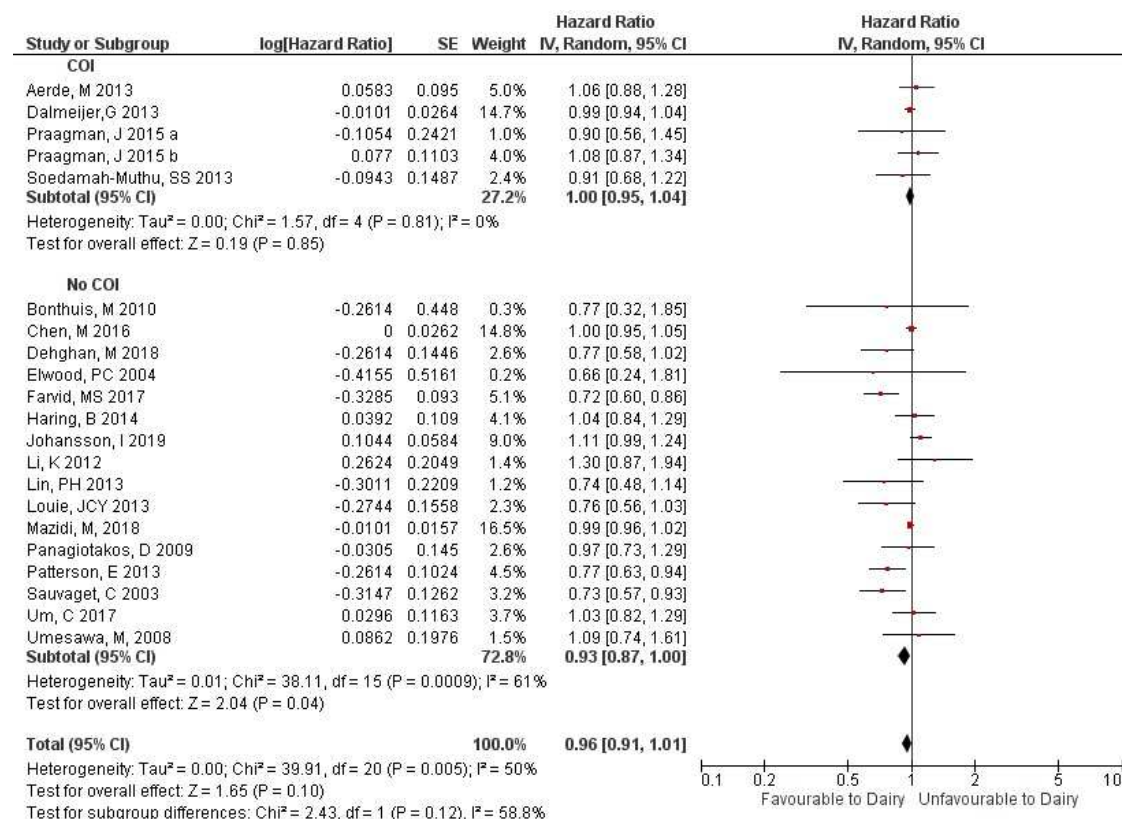

## Effect Size, Elevated Blood Pressure / Hypertension: Industry ties v no industry ties

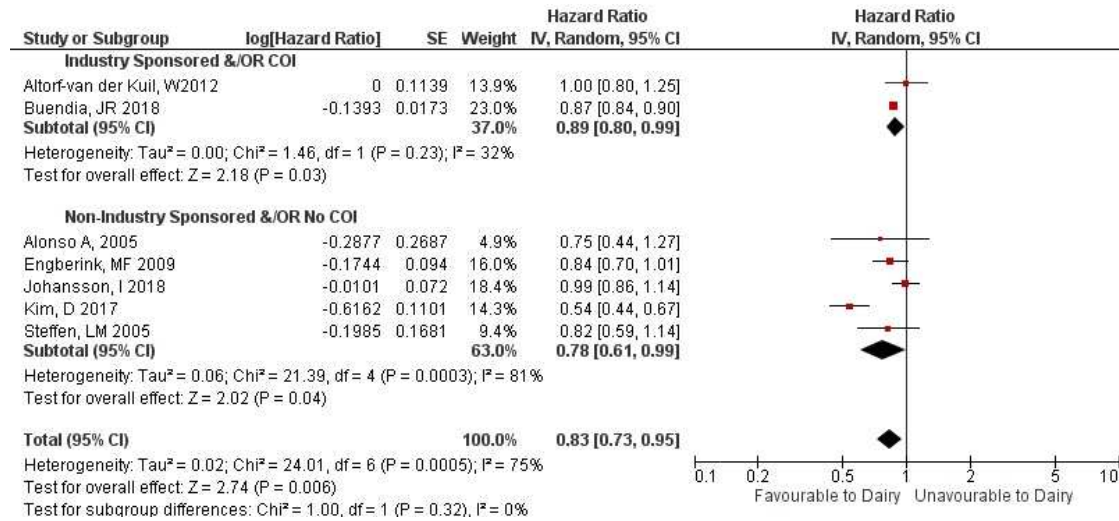

Supplement: bmjopen-2020-039036supp008_data_supplement.pdf [file bmjopen-2020-039036supp008_data_supplement.pdf]
